# Supplementary material for: Retinal metabolism displays evidence for uncoupling of glycolysis and oxidative phosphorylation via Cori-, Cahill-, and mini-Krebs-cycle
Source: eLife. 2024 May 13;12:RP91141. doi: 10.7554/eLife.91141 (PMC11090511; doi:10.7554/eLife.91141)
Supplement: Figure 2—source data 1. — A total of 50 metabolites were quantified in control, no retinal pigment epithelium (RPE), 1,9-dideoxyforskolin (1,9-DDF), Shikonin, and carbonyl cyanide-p-trifluoromethoxyphenylhydrazone (FCCP) groups. Each metabolite’s mean concentration value (µM concentration range) and standard deviation (stdev) is displayed in the table (n=5). [file elife-91141-fig2-data1.csv]

Metabolite	Control		no RPE		1,9-DDF		Shikonin		FCCP
	mean	stdev	mean	stdev	mean	stdev	mean	stdev	mean	stdev
3-Hydroxyisovalerate	13.97	0.71	8.50	5.60	15.69	0.83	6.91	0.64	13.28	1.82
Acetate	134.37	212.09	83.57	35.58	26.56	6.09	41.94	4.34	63.78	3.62
ADP	91.80	3.18	56.96	21.71	91.36	39.62	123.40	21.35	133.96	13.92
AMP	6.50	1.37	9.27	4.14	5.12	1.65	8.28	3.31	11.57	1.99
ATP	111.64	4.07	102.16	12.37	126.97	6.27	62.28	7.13	78.04	8.75
Alanine	30.88	1.34	23.83	0.90	45.60	2.84	30.41	2.01	28.45	0.47
Arginine	21.03	3.10	22.37	0.70	21.77	2.59	17.96	3.85	25.23	3.71
Aspartate	240.26	22.62	138.78	13.16	377.35	37.21	223.56	35.98	107.92	5.58
Choline	3.25	0.52	3.93	0.49	3.50	0.46	5.38	1.35	4.32	0.54
Citrate	11.59	1.85	8.68	0.51	11.13	1.72	8.77	1.77	11.50	0.88
Creatine	200.76	6.06	117.57	3.95	171.33	9.95	220.43	16.45	129.13	10.72
Creatine phosphate	111.71	8.79	106.39	4.98	179.87	9.17	102.16	7.60	136.56	9.01
Formate	387.21	132.70	95.34	9.51	321.54	30.90	550.33	109.43	78.55	7.45
Fumarate	1.75	0.41	1.83	0.18	1.44	0.66	2.13	0.46	1.99	0.28
GSSG	10.97	4.85	19.46	3.20	19.28	3.49	1.72	0.16	10.82	1.43
GABA	123.51	5.34	142.39	9.21	115.44	10.70	120.43	8.75	115.39	5.80
Glutamate	105.77	3.54	117.12	3.83	225.72	22.79	98.88	9.83	125.64	9.89
Glutamine	42.41	11.77	36.26	1.67	36.77	7.77	27.68	1.52	65.35	6.98
Glutathione	5.31	2.64	9.06	4.51	11.97	5.23	0.72	0.07	8.48	2.39
Glycine	428.57	64.62	695.40	18.31	365.60	41.00	489.51	36.65	424.66	16.65
GDP	22.03	1.22	13.74	8.70	21.70	6.69	25.40	3.55	23.57	5.13
GMP	15.73	3.06	17.97	2.82	7.83	6.23	5.59	1.15	14.97	10.64
GTP	345.07	22.86	329.94	33.08	331.35	56.46	194.02	29.06	227.33	32.42
Hypotaurine	83.41	26.15	157.68	10.72	105.45	43.05	105.95	13.81	117.47	19.38
Isoleucine	6.57	0.87	8.65	0.53	4.34	0.62	6.53	0.54	10.39	1.46
Lactate	28.96	10.15	107.26	26.54	17.77	2.35	21.12	4.30	132.39	27.23
Leucine	8.13	0.50	10.59	0.43	6.68	0.14	8.90	0.99	12.36	0.84
Lysine	25.29	1.66	22.81	1.94	23.43	11.49	18.61	6.07	28.44	1.70
Malonate	6.32	2.37	7.10	0.47	2.53	1.78	4.49	0.40	5.69	1.83
Methionine	4.04	1.00	8.40	2.16	1.71	1.01	3.19	0.90	6.27	2.80
N,N-Dimethylglycine	1.92	0.25	2.33	0.19	2.01	0.37	1.22	0.09	1.84	0.32
NAA	24.44	3.11	19.53	1.93	29.65	1.20	21.47	2.70	15.12	1.34
NAD+	15.12	1.58	14.56	0.63	20.27	3.68	16.74	1.00	12.07	1.21
O-Acetylcarnitine	6.06	0.33	5.87	2.08	6.18	0.87	2.99	1.27	8.30	0.89
O-Phosphocholine	72.58	3.73	61.38	4.26	147.99	13.72	73.42	9.61	55.45	5.97
O-PE	151.57	10.21	151.61	7.95	200.37	22.15	134.08	10.02	129.24	10.81
Phenylalanine	9.78	0.40	8.64	0.72	7.90	0.59	8.65	0.87	10.56	0.91
Serine	38.42	22.12	65.71	3.67	76.21	8.82	69.41	3.34	62.45	7.19
Succinate	7.68	3.48	4.41	0.40	3.91	0.58	6.34	0.75	5.22	0.53
Taurine	1245.66	6.10	1134.92	25.75	1415.34	108.01	1420.02	118.29	1175.96	65.01
Threonine	32.37	1.86	46.36	2.81	31.26	3.49	29.77	2.16	41.97	2.90
Tyrosine	13.36	0.50	14.49	1.29	9.78	0.68	13.55	0.51	15.99	1.53
UDP-GalNAc	2.99	3.79	4.32	4.41	4.10	3.51	9.48	1.50	4.36	3.35
UDP-GlcNAc	6.95	1.98	6.89	0.48	10.23	1.96	8.12	0.87	7.15	1.30
UDP-Gal	2.39	2.06	1.37	1.51	4.32	2.87	5.07	1.47	3.67	2.64
UDP-Glc	11.28	2.40	10.60	0.86	13.95	3.37	9.14	2.69	11.13	1.48
Valine	8.28	0.42	10.94	0.46	6.39	0.68	8.25	0.55	12.42	1.17
myo-Inositol	87.52	6.59	49.16	4.40	77.75	7.61	73.02	15.25	51.82	4.17
GPC	24.49	3.36	22.15	0.79	19.43	1.57	27.50	2.36	23.37	3.50
π-Methylhistidine	51.85	4.98	9.86	4.71	60.29	9.32	5.59	0.84	9.36	4.12
